# Supplementary material for: Immunometabolic Modulatory Role of Naltrexone in BV-2 Microglia Cells
Source: MDPI journal article supplement (doi:10.3390/ijms22168429), 2021-08-05
Supplement: s1 [file s1]

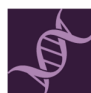

Supplementary

## Immunometabolic Modulatory Role of Naltrexone in BV-2 Microglia Cells

Natalia Kučić <sup>1,\*</sup>, Valentino Rački <sup>2</sup>, Roberta Šverko <sup>3</sup>, Toni Vidović <sup>3</sup>, Irena Grahovac <sup>4</sup> and Jasenka Mršić-Pelčić <sup>5</sup>

<sup>1</sup> Department of Physiology and Immunology, Faculty of Medicine, University of Rijeka, Braće Branchetta 20, 51000 Rijeka, Croatia

<sup>2</sup> Department of Neurology, Clinical Hospital Center Rijeka, University of Rijeka, Krešimirova 42, 51000 Rijeka, Croatia; valentino.racki@uniri.hr

<sup>3</sup> Emergency Department, Clinical Hospital Center Rijeka, University of Rijeka, Krešimirova 42, 51000 Rijeka, Croatia; roberta.sverko@gmail.com (R.Š.); vidovic.toni@yahoo.com (T.V.)

<sup>4</sup> Pharmacy Irena Grahovac, Trg I. Istarske brigade 5, 52100 Pula, Croatia; irena.grahovac@pu.t-com.hr

<sup>5</sup> Department of Pharmacology, Faculty of Medicine, University of Rijeka, Braće Branchetta 20, 51000 Rijeka, Croatia; jasenka.mrsic.pelcic@medri.uniri.hr

\* Correspondence: natalia.kucic@medri.uniri.hr; Tel.: +385-51-651-192; Fax: +385-51-675-699

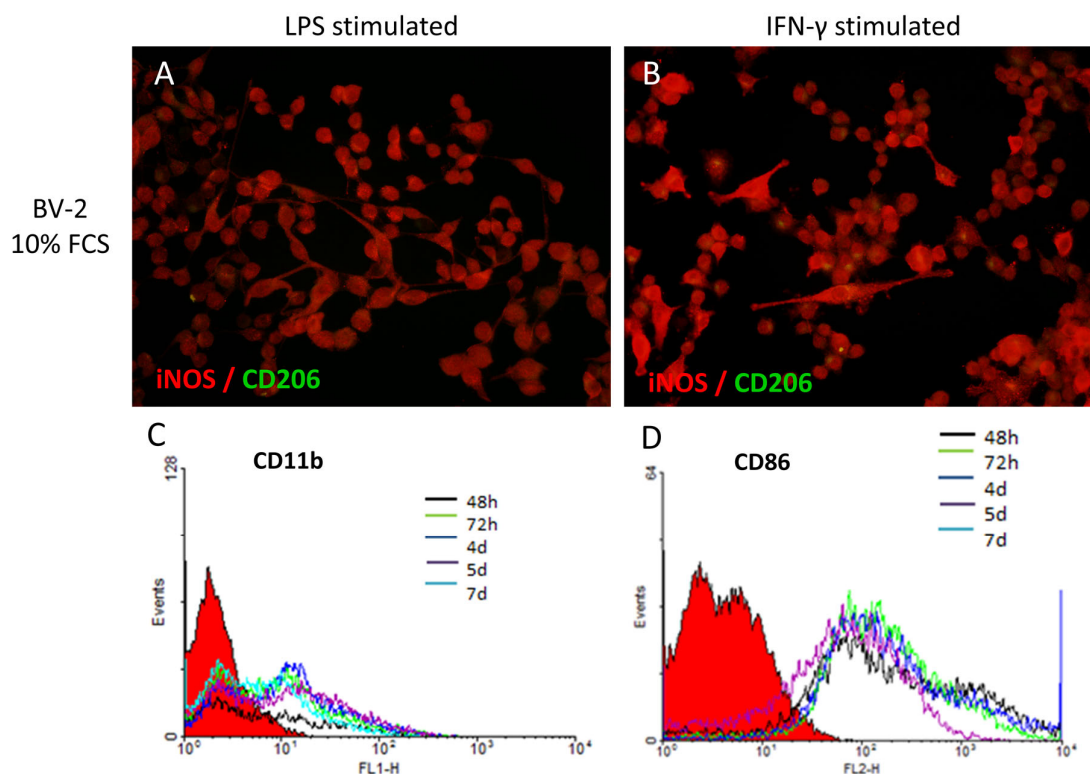

**Supplementary Figure S1.** Microglial phenotype upon lipopolysaccharide and interferon gamma stimulation, and the expression of microglial phenotypic markers in cultivation conditions. Microglial cells stimulated with lipopolysaccharide (A) and interferon gamma (B) exhibit strong expressions of iNOS, while there is only minor expression of CD206 in both stimulation conditions. Cultivating BV-2 microglia cells in an extended period of time, up to 7 days, does not significantly change their expression of cell surface markers. Our cell cultures retained the expression of CD11b (C), confirming their lineage, while also retaining a necessary functional marker CD86 (D).
